# Supplementary material for: CTCF-mediated insulation and chromatin environment modulate Car5b escape from X inactivation
Source: Springer Nature journal article supplement (doi:10.1186/s12915-025-02137-7), 2025-03-03

## Additional file 1:

**Figure S1. Selection of eight escapees for domain and CTCF analysis.** **A, B.** Escapees with a significant level of escape were selected based on allelic RNA-seq and ChIP-seq for RNA polymerase II in Patski cells (**A**) or brain (**B**) ( $X_i/X_{i+X_a}$  ratio  $\geq 0.1$  and expression  $\geq 5$  TPM/RPKM). Genes with low escape levels (highlighted in red) often do not have strong CTCF binding sites, and thus were not included in escape domain analysis. By these criteria, no facultative escapees were chosen for brain. In addition to *Car5b* and *Shroom4* additional four genes (*Mid1*<sup>a</sup>, *Asmt*<sup>a</sup>, *Atp6ap1*<sup>b</sup> and *1810030O07Rik*<sup>c</sup>) can be classified as facultative escapees in Patski cells. However, *Mid1* spans the boundary of the PAR and *Asmt* is in the PAR, but the arrangement of these genes differs between B6 and *Mus spretus*, which complicates survey of CTCF binding patterns on the  $X_i$  and  $X_a$  [29], and led us to exclude these two genes for escape domain analysis. *Atp6ap1* and *1810030O07Rik* were also excluded as explained in **C** and **D** panels. **C.** RNA-seq reads for *Atp6ap1* locate throughout the gene body on the  $X_a$ , but are exclusively from the 5' end of the gene on the  $X_i$  based on a single SNP, which suggests misassignment of reads due to an incorrect SNP. **D.** While *1810030O07Rik* shows convincing evidence of escape, no CTCF binding was detected on the  $X_i$  or  $X_a$  at any regions within this gene or its neighbors subject to XCI.

**Figure S2. Escape domains in adult mouse brain.** **A.** UCSC browser views of profiles of CTCF ChIP-seq reads on the  $X_a$  (blue) and  $X_i$  (green) are shown in domains around the facultative escapee *Shroom4* and the constitutive escapees *Kdm6a*, *Eif2s3x*, *Xist*, *Pbdc1*, and *Kdm5c* in adult mouse brain. Putative escape domains are shaded in yellow, and silenced domains, in blue. CTCF peaks that flank escape domains around the constitutive escapees *Kdm6a*, *Eif2s3x*, *Xist*, *Pbdc1*, and *Kdm5c* are similar in Patski cells and mouse brain (see also the *Ddx3x* domain in Fig. 1B). In contrast, CTCF peaks around the facultative escapees *Shroom4* (and *Car5b*, see Fig. 1C) present on the  $X_i$  in Patski cells but are absent in brain, consistent with silencing of these genes in brain. ChIP-seq data are from [16,27]. Escapees are labeled in red, inactivated genes, in black, and genes with an unknown XCI status, in grey. See also Fig. 2A-F. **B.** Low levels of *Gpr34* expression from the  $X_i$  are apparent in mouse adult brain, indicating escape from XCI. UCSC browser view of RNA-seq reads on the  $X_a$  (blue) and  $X_i$  (green) are shown at *Gpr34*.

**Figure S3. Allelic profiles of histone marks at escape domains in Patski cells.** Profiles of H3K27ac as an active mark and of H3K27me3 as a repressive mark obtained by CUT&RUN on the  $X_a$  (blue) and  $X_i$  (green) at the escape domains of (**A**) the facultative escapee *Shroom4*, and (**B-G**) six constitutive escapees, *Kdm6a*, *Ddx3x*, *Eif2s3x*, *Xist*, *Pbdc1*, and *Kdm5c*. Escapees show enrichment in H3K27ac and depletion in H3K27me3 on the  $X_i$ , while neighbor genes subject to XCI show an opposite pattern. Putative escape domains are shaded in yellow, and silenced domains, in blue. See Fig. 4B-C for profiles at *Car5b*. ENCODE cCREs are shown for promoters (red), proximal and distal enhancers (yellow and orange), and conserved CTCF sites (cyan). The putative proximal/distal enhancer cCRE of an escapee is marked by an orange arrow based on the highest  $X_i$ -H3K27ac enrichment close to this escapee.

**Figure S4. Conserved expression of *Car5b/CA5B* in mouse and human tissues and escape status.** **A.** Distribution of *Car5b/CA5B* expression in multiple tissues in mouse (blue) and human (red). Expression levels are shown in TPM from the Expression Atlas of EMBL-EBL for mouse and GTEX for human. **B.** Dynamic expression of *Car5b* during mouse development. Note that kidney shows the highest expression level of *Car5b* among tissues, which seems evident from embryonic stage ~E17. Expression levels are shown in TPM from the Expression Atlas of EMBL-EBL. **C.** Allelic expression analysis by B6-specific Apal digestion shows that *Car5b* does not escape in the mouse adult tissues tested. PCR products from amplification of *Car5b* cDNA from mouse adult brain, spleen, heart, kidney, liver and ovary, and from MEFs, all with the Xi from *spretus*, and control genomic DNA (gDNA) from B6 and a F1 B6 x *spretus* heart sample were subject to mock or Apal digestion (-/+) followed by gel electrophoresis. Complete digestion of PCR products from cDNA indicates the absence of transcripts from the *Car5b* allele on the *spretus* Xi, which lacks the Apal site (also see additional file 1: Fig. S6A). **D.** Allelic *Car5b* expression levels measured by allelic read counts and TPMs in mouse tissues and Patski cells confirm that *Car5b* escapes in Patski cells but not in brain, spleen, and ovary based on the Xi/Xi+Xa expression ratio. RNA-seq data from [16,27].

**Figure S5. Allelic editing of CTCF site P4 at *Car5b*.** **A.** Schematic of the ~2kb CTCF binding region P4 upstream of *Car5b* (Fig. 2B). The positions of the B6- and *sp*-specific sgRNA pairs used for CRISPR/Cas9 editing of the Xa (blue) and Xi (green) are marked by downward arrowheads. The positions of the non-allelic (F1, R1, F2, R2) and allelic primers (F, R; B6-R also used for allelic analysis of ChIP and 3C) are marked by black and colored arrows, respectively. The CTCF site P4 is marked by a red oval. **B.** Single-cell clones with deletion or inversion of the ~2kb region on the Xi or Xa were selected and verified by PCR using combinations of primers flanking the cutting sites (downward arrows in A) followed by Sanger sequencing to verify allelic editing. Examples of analysis of Xi-Del2 and Xi-Inv1 clones are shown. The SNP positions and the junction sequences are indicated on the Sanger sequence. Note that the missing PCR products of F2/R2 from the *sp* Xa in Xi-edited lines (e.g., Xi-Del2 and Xi-Inv1) is because R2 carries 6nt that are only present in B6 (see Additional file 2: Table S5). In addition, PCR products of F1/R2 are 2126bp for the intact allele, which is often observed if increasing PCR extension time (middle panel). **C.** PCR with allelic primers (F, R) flanking region P4 further confirms correct editing events demonstrating loss of the B6-Xi-specific CTCF region P4 in Xi-Del1&2, with retention in Xi-Inv1 and Xa-Del1, while loss of the *sp*-Xa-specific CTCF region P4 occurred only in Xa-Del1, and not in Xi-Del1&2 and Xi-Inv1.

**Figure S6. Allelic expression analysis using B6-specific restriction enzyme digestion.** **A-B.** B6-specific Apal digestion shows that only Xi-deletion of the P4 site abolishes *Car5b* escape in Patski cells. **A.** (left) Cartoon to show B6-specific Apal digestion which produces two bands with similar size since the Apa site is in the middle of B6 PCR products. (right) PCR products from genomic DNA from B6 mice or Patski cells were subject to mock or Apal digestion (-/+) followed by gel electrophoresis, which confirms B6-specific Apal digestion. **B.** PCR products from cDNA from P4-edited lines were subject to mock or Apal digestion (-/+) followed by gel electrophoresis. Only lines with Xi-specific deletion of P4 (Xi-Del) show absence of the digested band, indicating loss of *Car5b* escape. Two biological replicates of each of the two deleted lines Xi-Del1&2 and one for each of

the Xi-Inv lines were tested. Note that in one of the two replicates of Xi-Del2, a very weak digested band (red arrow) was observed, indicating a much lower level of *Car5b* escape compared to the control (Ctrl-a3). This is consistent with the results from Q-PCR analysis in this line (Fig. 3C). **C-D.** B6-specific BsrI digestion shows that editing of the CTCF region P4 located between *Car5b* and *Siah1b* on the Xi has no effects on *Siah1b*. **C.** PCR products from genomic DNA from B6 mice, cDNAs from F1 hybrid MEFs, and cDNA from Patski cells were subject to mock or Apal digestion (-/+) followed by gel electrophoresis, which confirms B6-specific BsrI digestion and no escape of *Siab1b* in either WT MEFs or Patski cells. **D.** PCR products from cDNA from Del-Xi lines were subject to mock or BsrI digestion (-/+) followed by gel electrophoresis. The absence of digested bands indicates absence of *Siab1b* escape.

**Figure S7. Design and validation of allelic primer pairs at the *Car5b* domain.** **A.** B6- or sp-specific primer pairs designed for P1, P2, the enhancer, and P4 are shown to complement Fig. 1A. The allelic primers for P4 were also used for confirmation of CTCF binding site editing (see Additional file 1: Fig. S5C). The sizes of amplicons are scaled and marked. Allelic primer pairs for P1, P2 and the enhancer are located in *Car5b* introns and thus can be used for analysis of nascent transcript levels (see Additional file 1: Fig. S8). **B.** Validation of allelic primer pairs using PCR with species-specific and Patski genomic DNA (gDNA). Primer pairs only yield PCR products from gDNA of their corresponding species.

**Figure S8. Escape levels of *Car5b* nascent transcripts are reduced after Xi-specific deletion but not inversion of P4.** **A.** B6- or sp-specific primer pairs for intronic regions (P1, P2 and the enhancer) were used for PCR using samples treated with reverse transcriptase (RT) and controls (No RT). Nascent *Car5b* transcripts were detected both from the B6-Xi and sp-Xa in WT, Xi-Del1&2, and Xi-Inv1, with a reduction of Xi products in Xi-Del1&2, but not in Xi-Inv1. Lower levels were seen in Xi-Del1 than in Xi-Del2. No products were detected in the absence of RT, indicating no genomic DNA contamination. **B.** The amounts of PCR products were estimated by ImageJ to calculate Xi/Xi+Xa ratios of nascent *Car5b* transcripts. The mean ratio for the three regions measured (P1, P2 and enhancer) was plotted for WT (0.330, 0.333, 0.311), Xi-Del1 (0.079, 0.173, 0.018), Xi-Del2 (0.223, 0.268, 0.262) and Xi-Inv1 (0.331, 0.322, 0.359), and comparison between lines done by two-tail paired student's t-test. Error bar: SEM. A significant decrease of escape levels of nascent transcripts is observed in Xi-Del1&2 lines, but not in Xi-Inv1 compared to WT, with the largest decrease in Xi-Del1, consistent with allelic expression analysis of exon products (see Fig. 3C and Additional file 1: Fig. S6B).

**Figure S9. Confirmation of CTCF contribution to protection of the *Car5b* escape domain from changes in histone modifications.** Allelic profiles of CTCF (**A**), H3K27ac (**B**), and H3K27me3 (**C**) obtained by CUT&RUN are shown for the *Car5b* escape region in Xa-Del and in Xi-Del2. Similar but less pronounced effects than those observed in Xi-Del1 (Fig. 4A-C) are seen in Xi-Del2, including loss of CTCF peaks, loss of H3K27ac, and gain of H3K27me3 at *Car5b*.

**Figure S10. Xi-specific ChIP-PCR confirms that deletion but not inversion of P4 on the Xi affects CTCF, RAD21, and H3K27ac levels at P1, P2, and the enhancer in the *Car5b* escape domain.** ChIP for CTCF, RAD21, and H3K27ac was performed in WT, Xi-Del1, Xi-Del2, and Xi-Inv1, followed by allelic PCR using B6-

specific primer pairs targeting P1 (**A, B**), P2 (**C, D**), enhancer (**E, F**) and P4 (**G, H**). Gel images are shown in **A, C, E, and G**, and enrichment plots (density ratio between ChIP and input PCR products analyzed by ImageJ) in **B, D, F, and H**. A mock ChIP control (no antibody) is included. Primer design is shown in Additional file 1: Fig. S7. As expected, no Xi enrichment of any marks was detected at P4 in either of the two Xi-Del clones. The strongest enrichment in CTCF and RAD21 was detected at P4 compared to P1, P2, and the enhancer in both WT and Xi-Inv1. The second strongest CTCF enrichment was detected at P2, with a 10-20% decrease in Xi-Del clones but not in Xi-Inv1, compared to WT. Enrichment in CTCF at P1 and at the enhancer and enrichment of RAD21 at P1, P2, and the enhancer were too weak to evaluate changes between WT and edited clones. A strong enrichment in H3K27ac was observed at the enhancer, which shows a clear decrease in Xi-Del1 compared to WT, consistent with decrease *Car5b* escape in Xi-Del1.

**Figure S11. CTCF binding is required for enhancing *Car5b* escape in Patski cells with a *Dxz4* deletion.**

**A.** Profiles of chromatin accessibility determined by ATAC-seq and of CTCF binding based on ChIP-seq are shown at *Car5b* on the Xa (blue) and Xi (green) in WT and Del-Hinge Patski cells. Only minor differences are observed between WT and De-Hinge profiles, consistent with a small increase of *Car5b* escape in Del-hinge (Fig. 6B). The CTCF sites P1-4 are marked, an orange box indicates the position of the enhancer and a red box that of the promoter. **B.** B6-specific Apal digestion of RT-PCR products shows that Xi-specific deletion of P4 in Del-Hinge cells (Xi-Del3) strongly decreases *Car5b* escape (red arrow). In contrast, deletion of P4 on the Xa in Del-Hinge cells (Xa-Del2, Xa-Del3) shows no change compared to unedited Del-Hinge lines Dh-a7, Dh-a1. The gel electrophoresis image shows mock and Apal digestion (-/+) of the PCR products.

**Figure S12. Allelic analysis of H3K4me3 in WT, Del-Firre, and Del-Firre+tg cells.** Profiles of H3K4me3 enrichment determined by CUT&RUN on the Xa (blue) and Xi (green) are shown at *Car5b* in WT, Del-Firre, and Del-Firre+tg cells. H3K4me3 increases at the enhancer of *Car5b* in cells with *Firre* depletion (Del-Firre), consistent with increased expression from the Xi (see also Fig. 6E). This pattern is reversed in Del-Firre+tg cells.

**Figure S13. Inhibition of DNA methylation has no effect on *Car5b* escape but cause reactivation of neighbor genes subject to XCI.** Allelic TPMs for the Xi allele, the Xa allele, and escape ratios (Xi/Xi+Xa expression) were plotted for *Car5b* and neighbor genes *Ap1s2*, *Zrsf2*, and *Siah1b*. RNA-seq data from [27]. Inhibition of DNA methylation was done by treatment of WT or Del-hinge Patski cells with 4  $\mu$ M 5-aza-2'-deoxycytidine (aza), with effects compared to those in a DMSO mock control. Two biological replicates per treatment were done.

Fig. S1

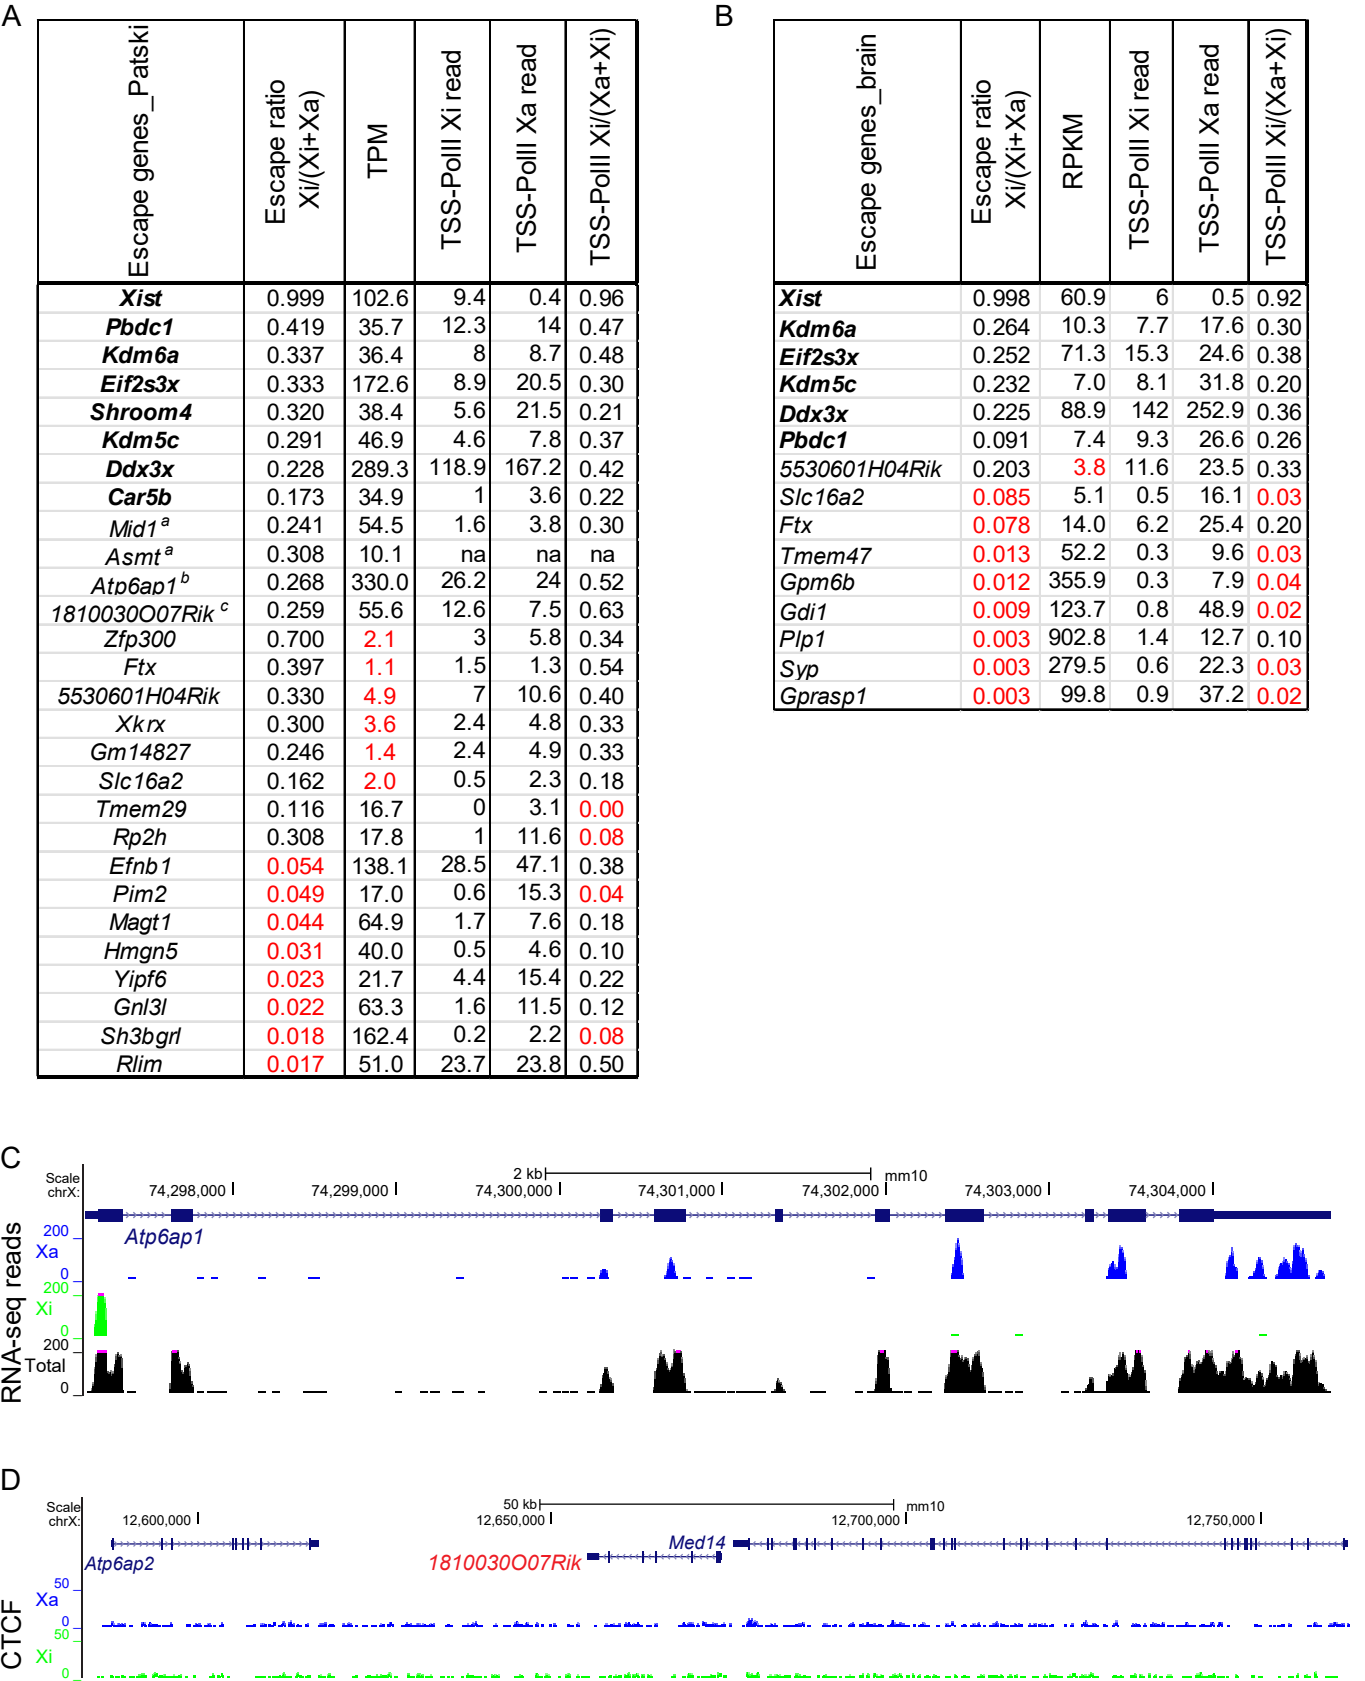

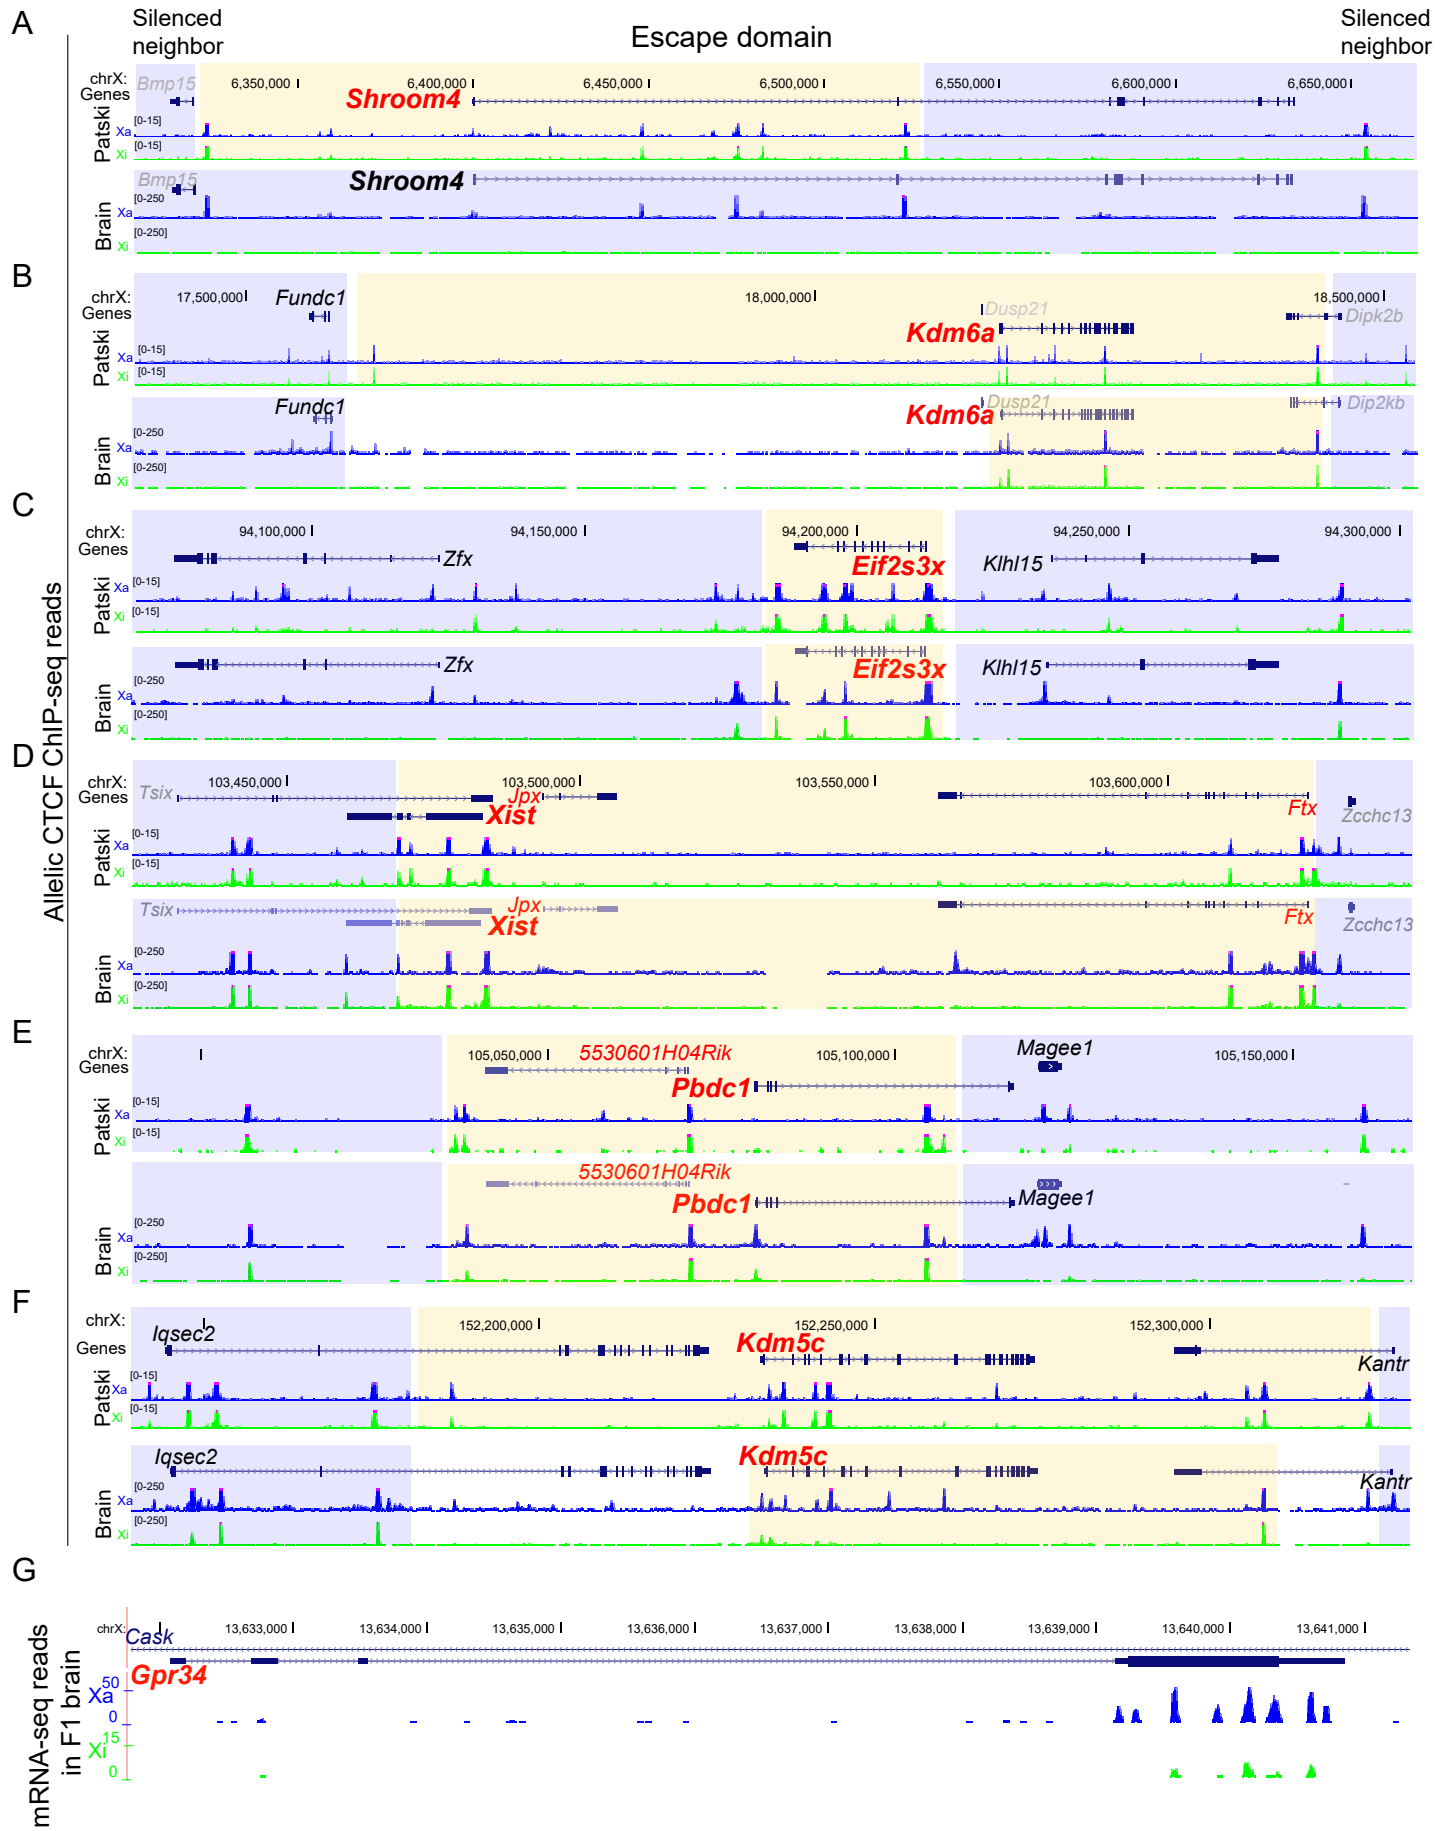

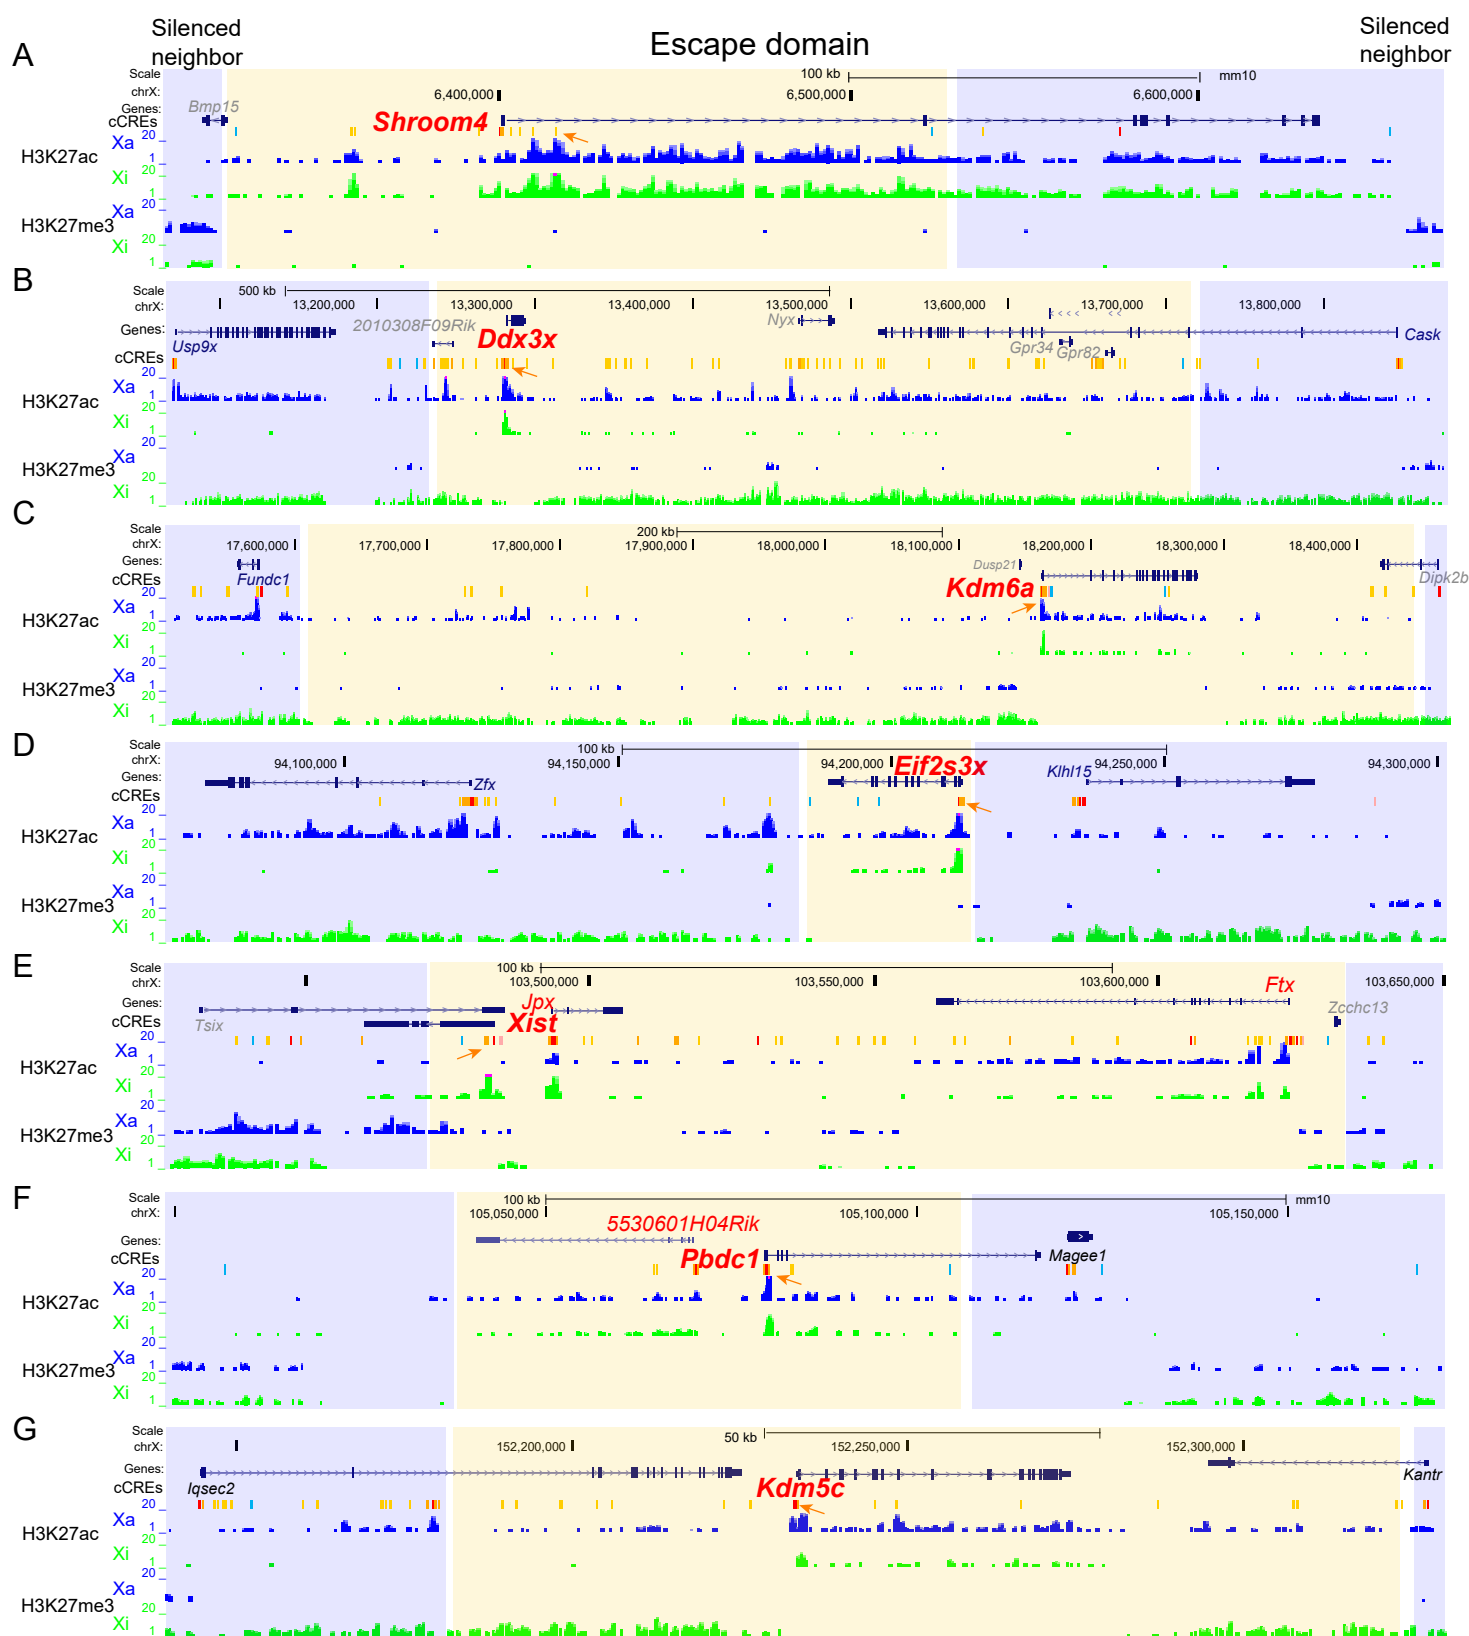

Fig. S4

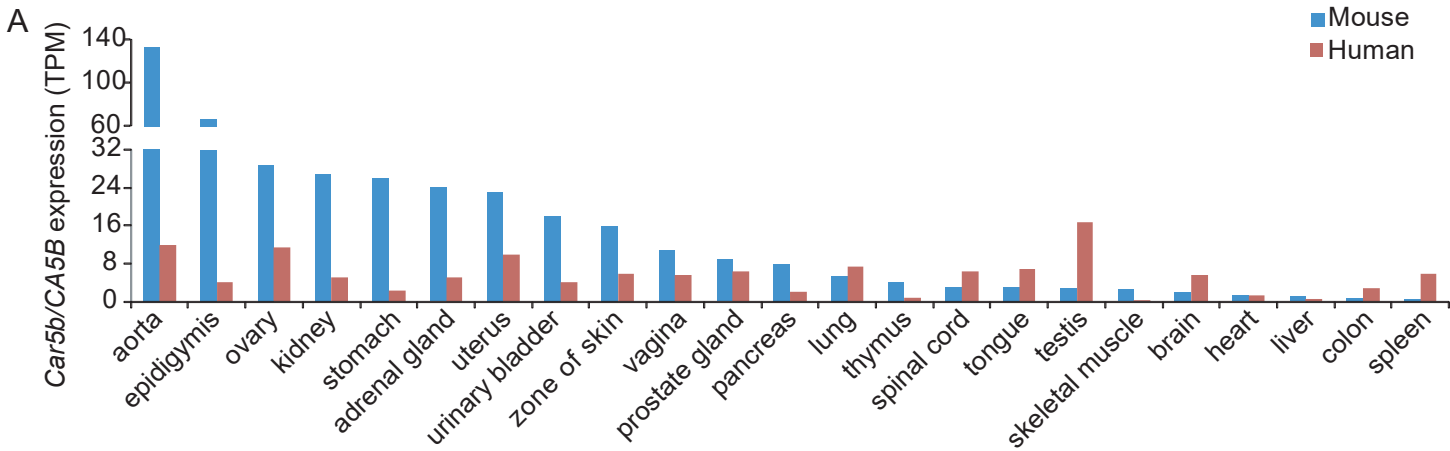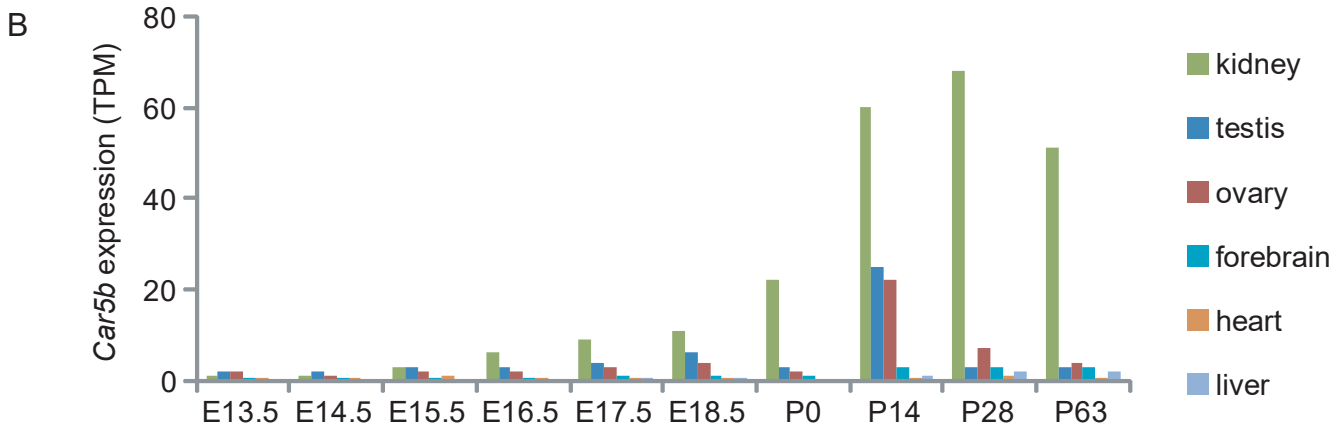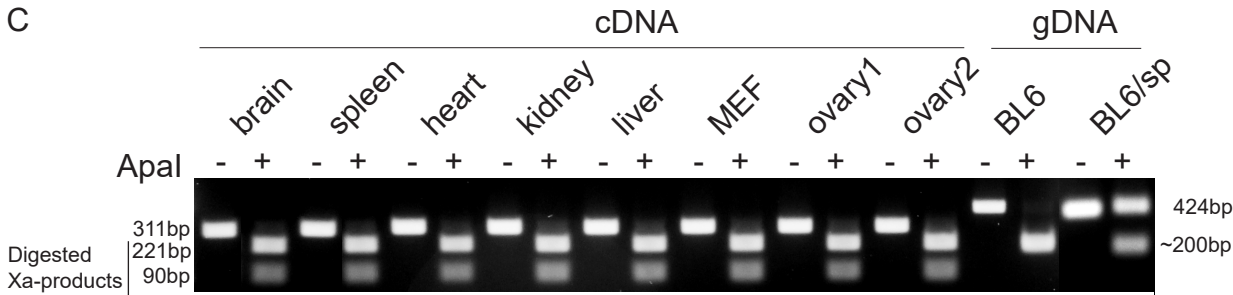

**D**

| <i>Car5b</i>    | Mouse adult tissues |        |         |         |       | Cell line_E18.5 kidney |             |
|-----------------|---------------------|--------|---------|---------|-------|------------------------|-------------|
|                 | brain1              | brain2 | spleen1 | spleen2 | ovary | Patski-rep1            | Patski-rep2 |
| TPM             | 1.2                 | 1.4    | 0.5     | 0.2     | 23.3  | 37.8                   | 35.2        |
| Xa read counts  | 107                 | 27     | 75      | 9       | 2290  | 4396                   | 4302        |
| Xi reads counts | 3                   | 0      | 1       | 0       | 21    | 1237                   | 1162        |
| Xa-TPM          | 1.1                 | 1.4    | 0.5     | 0.2     | 23.1  | 29.5                   | 27.7        |
| Xi-TPM          | 0.03                | 0      | 0.01    | 0       | 0.21  | 8.3                    | 7.5         |
| Xi/total ratio  | 0.03                | 0      | 0.01    | 0       | 0.01  | 0.22                   | 0.21        |



Fig. S5

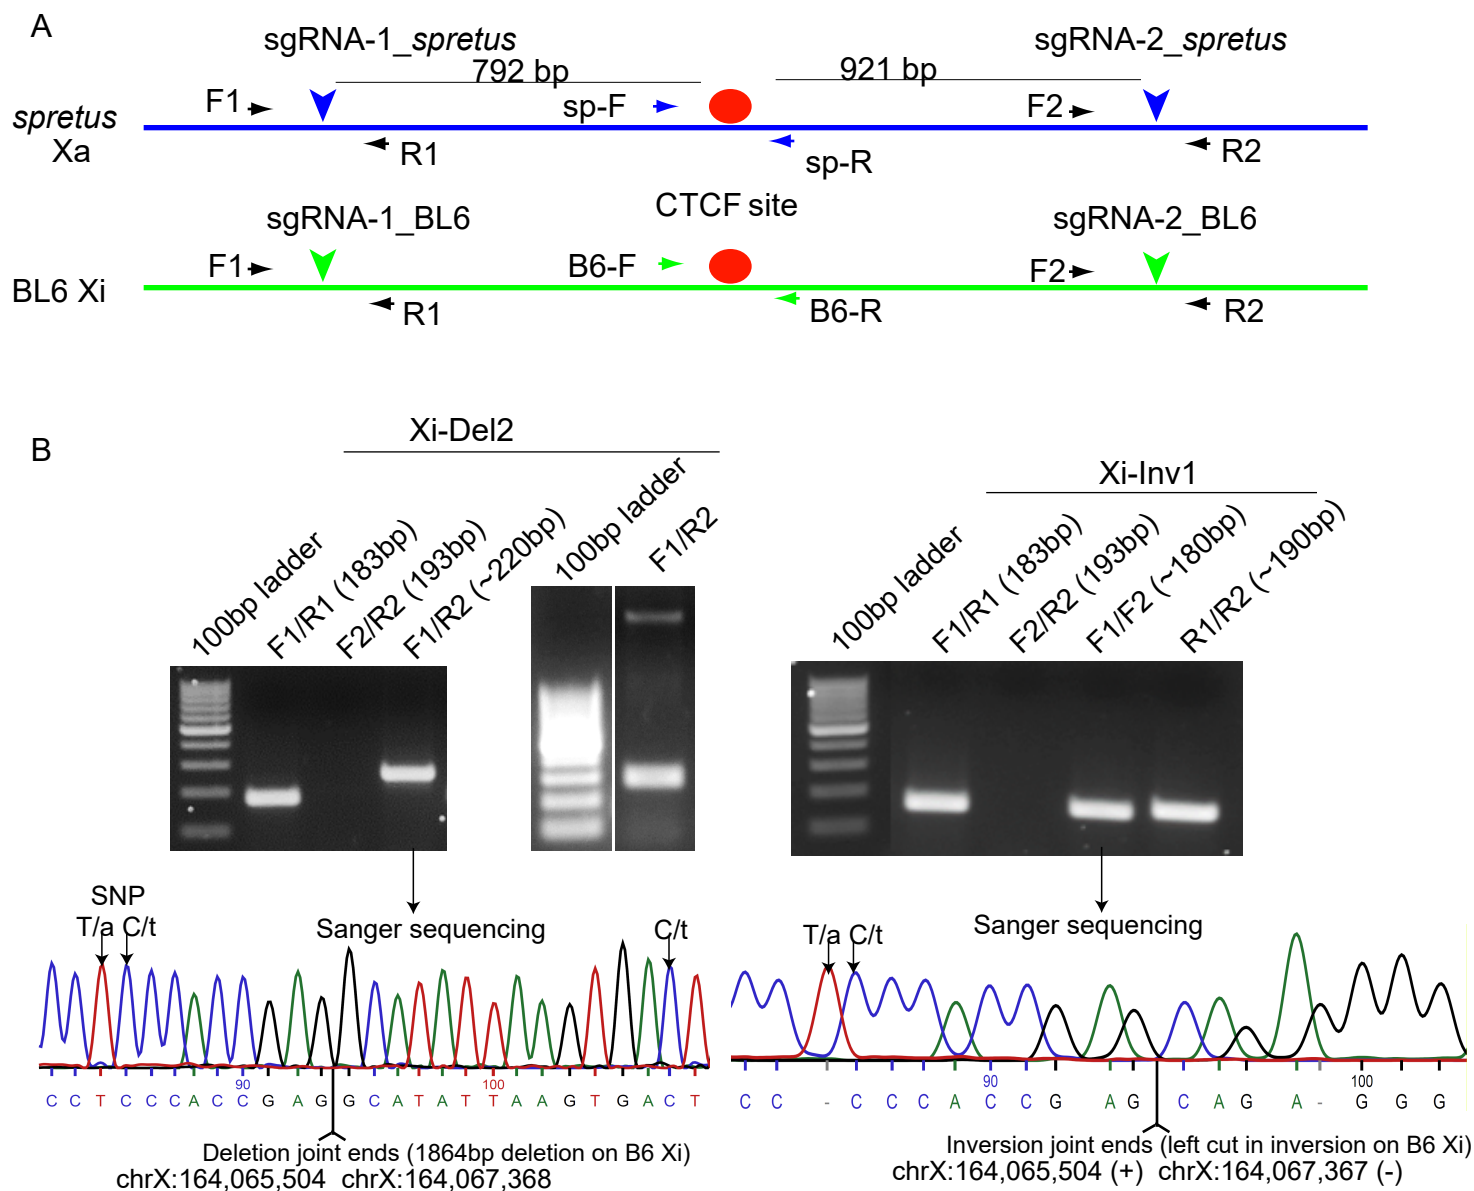

### A Allelic Apal digestion of PCR products from genomic DNA

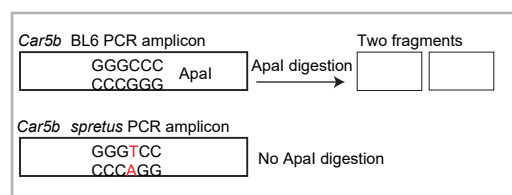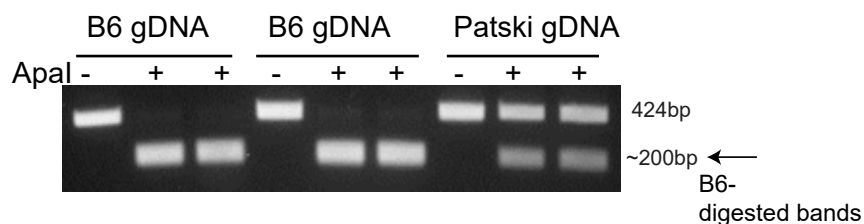

### B Allelic Apal digestion of PCR products from cDNA

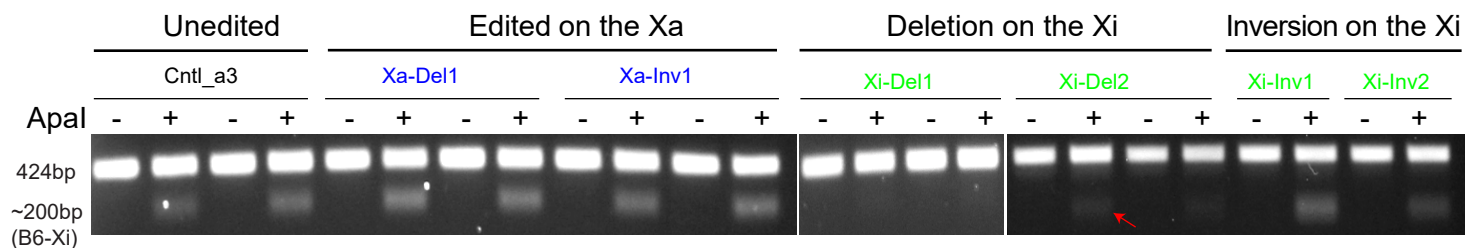

### C B6-specific Bsrl digestion of amplicons from *Siah1b*

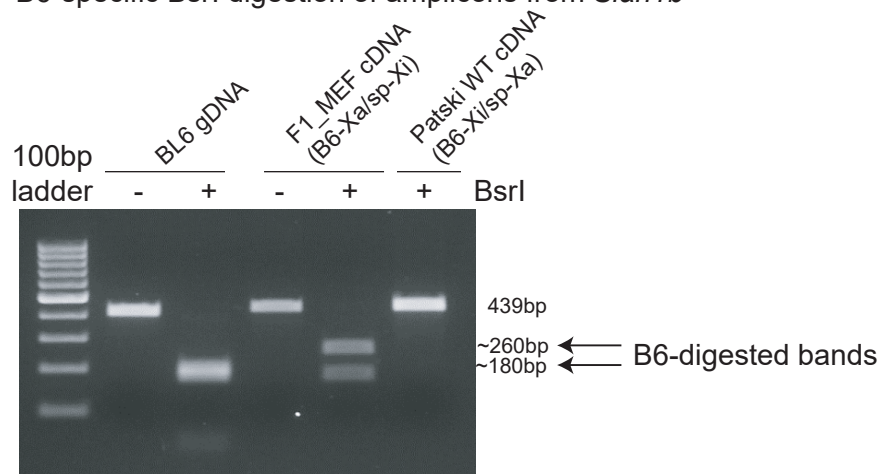

### D Bsrl digestion of *Siah1b* amplicons from cDNA of Xi-edited clones

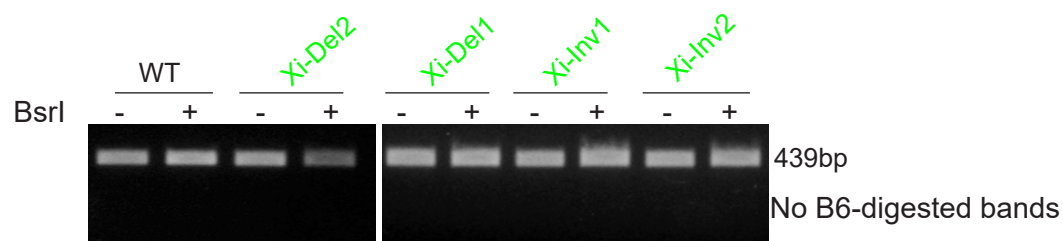

Fig S7

A

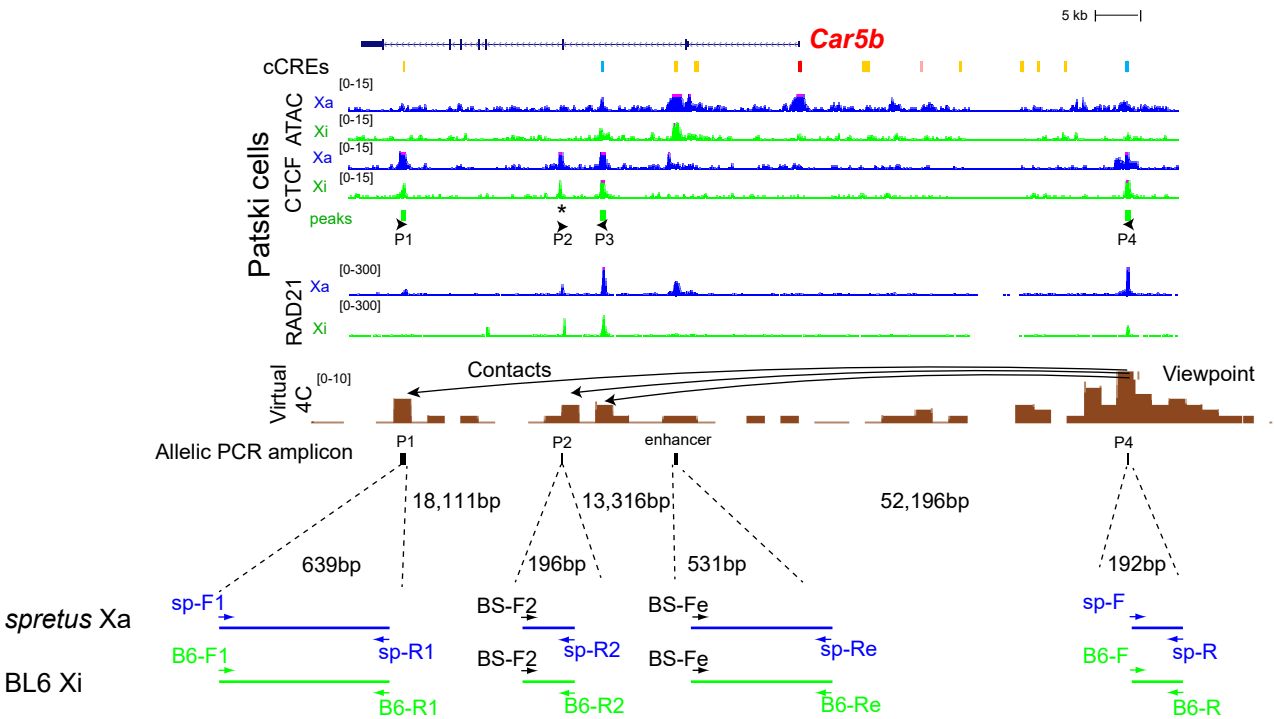

B

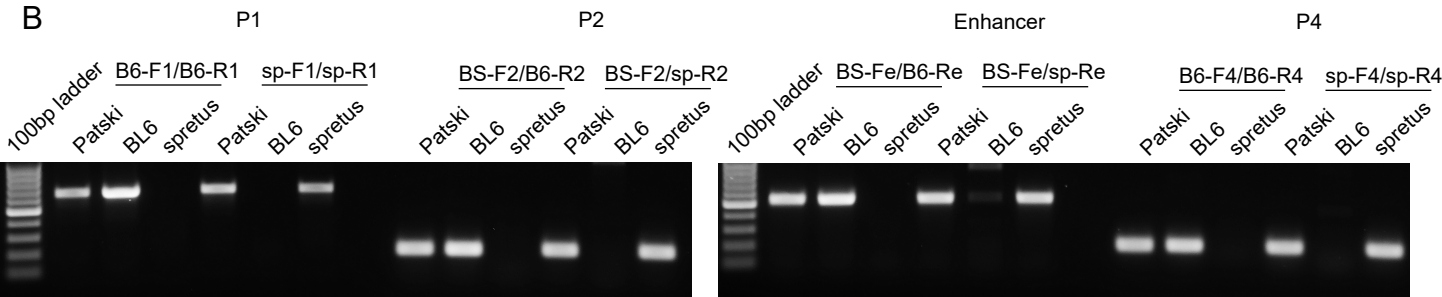

Fig S8

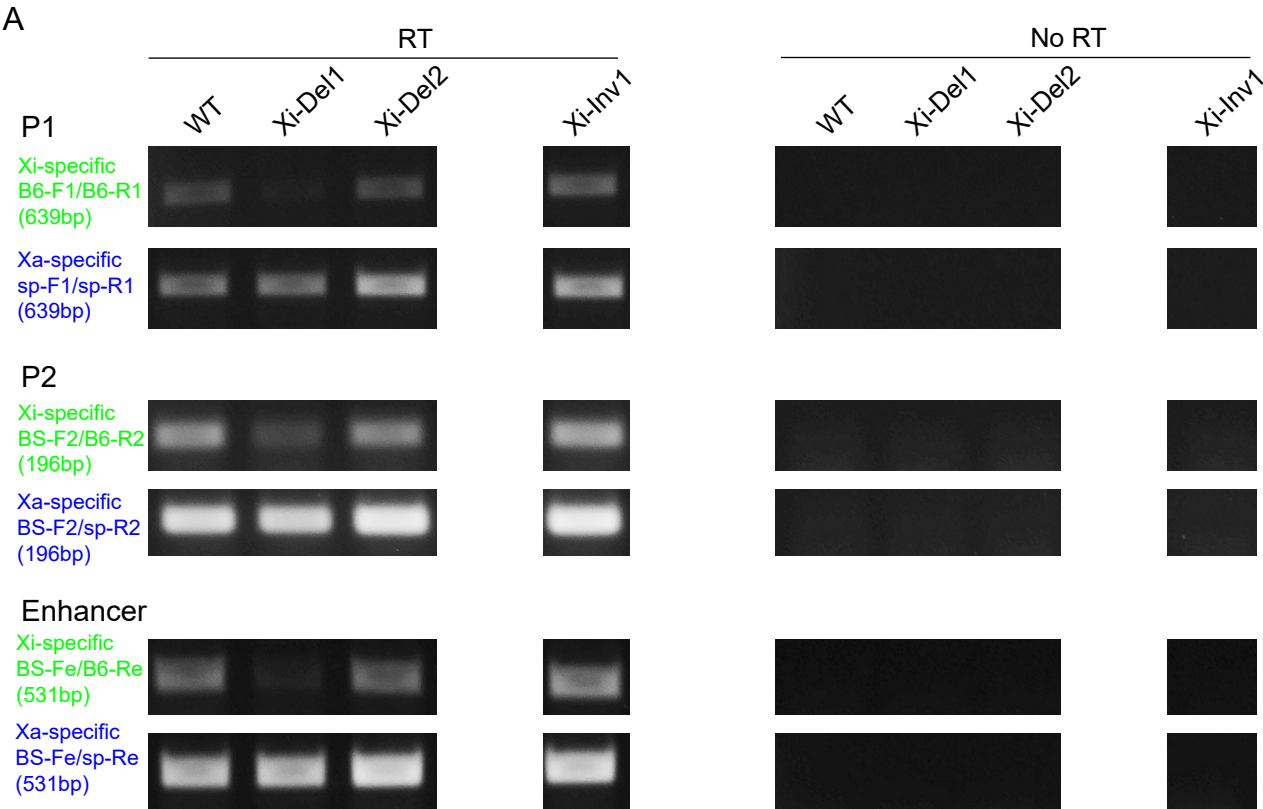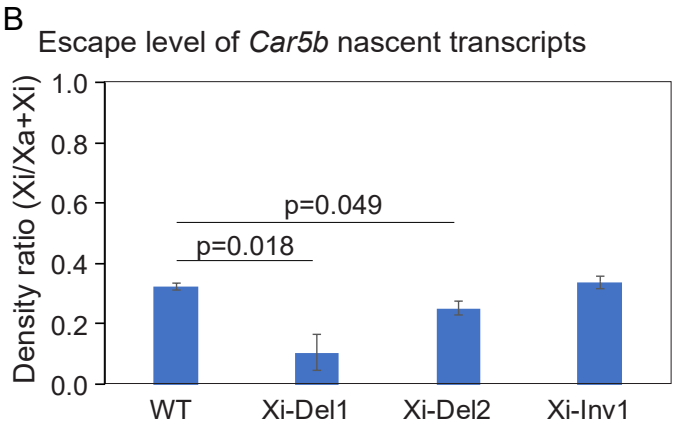

Fig. S9

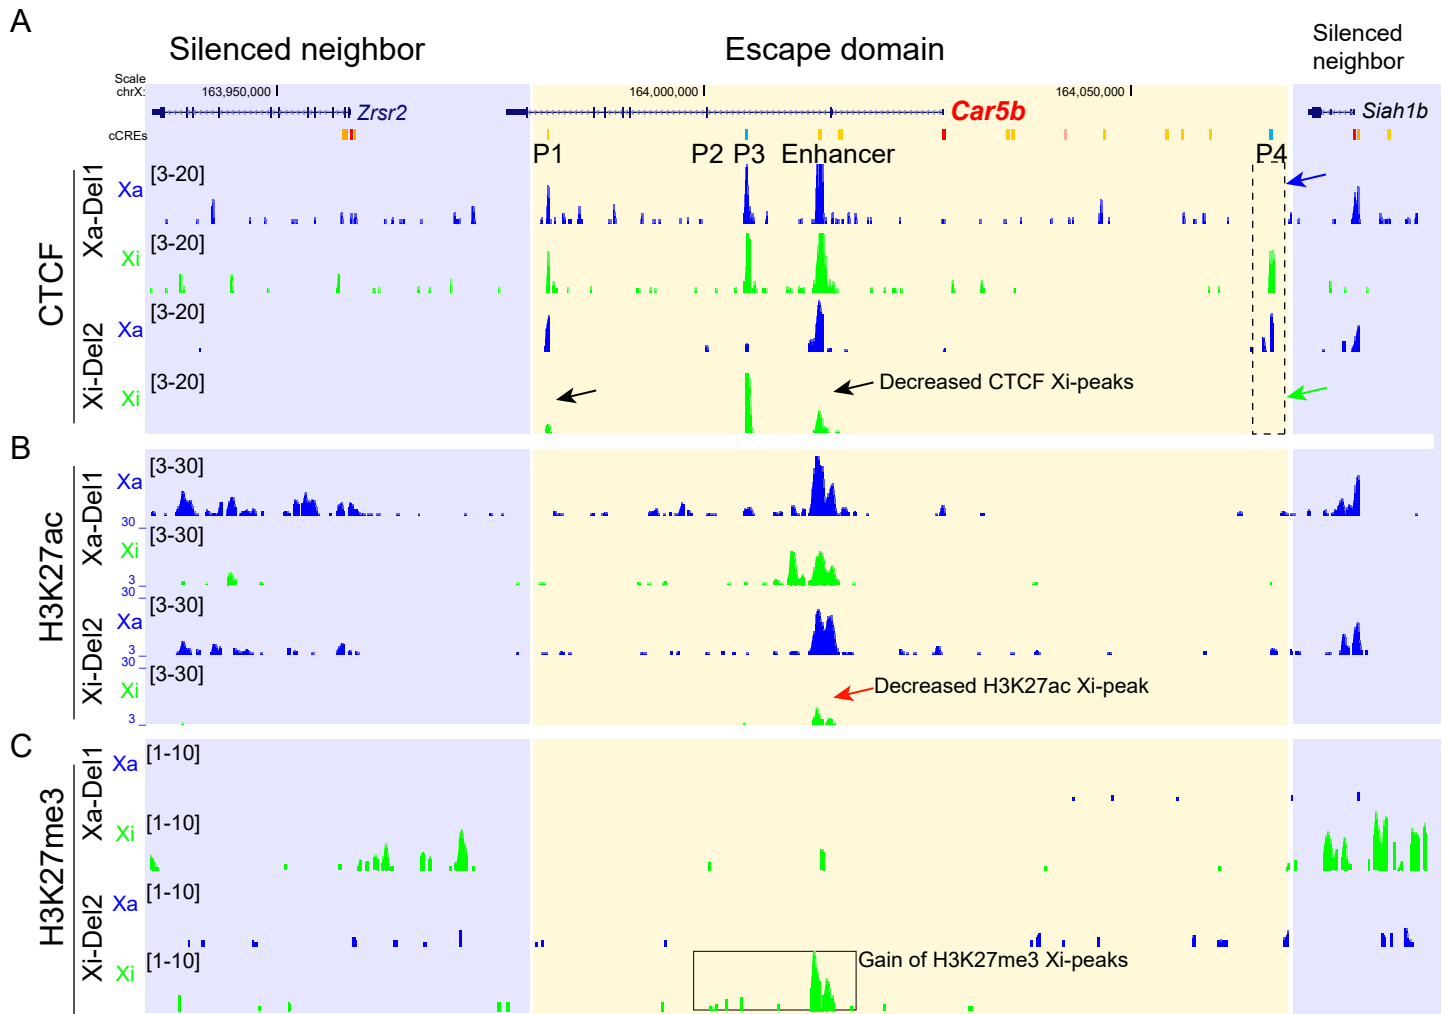

Fig S10

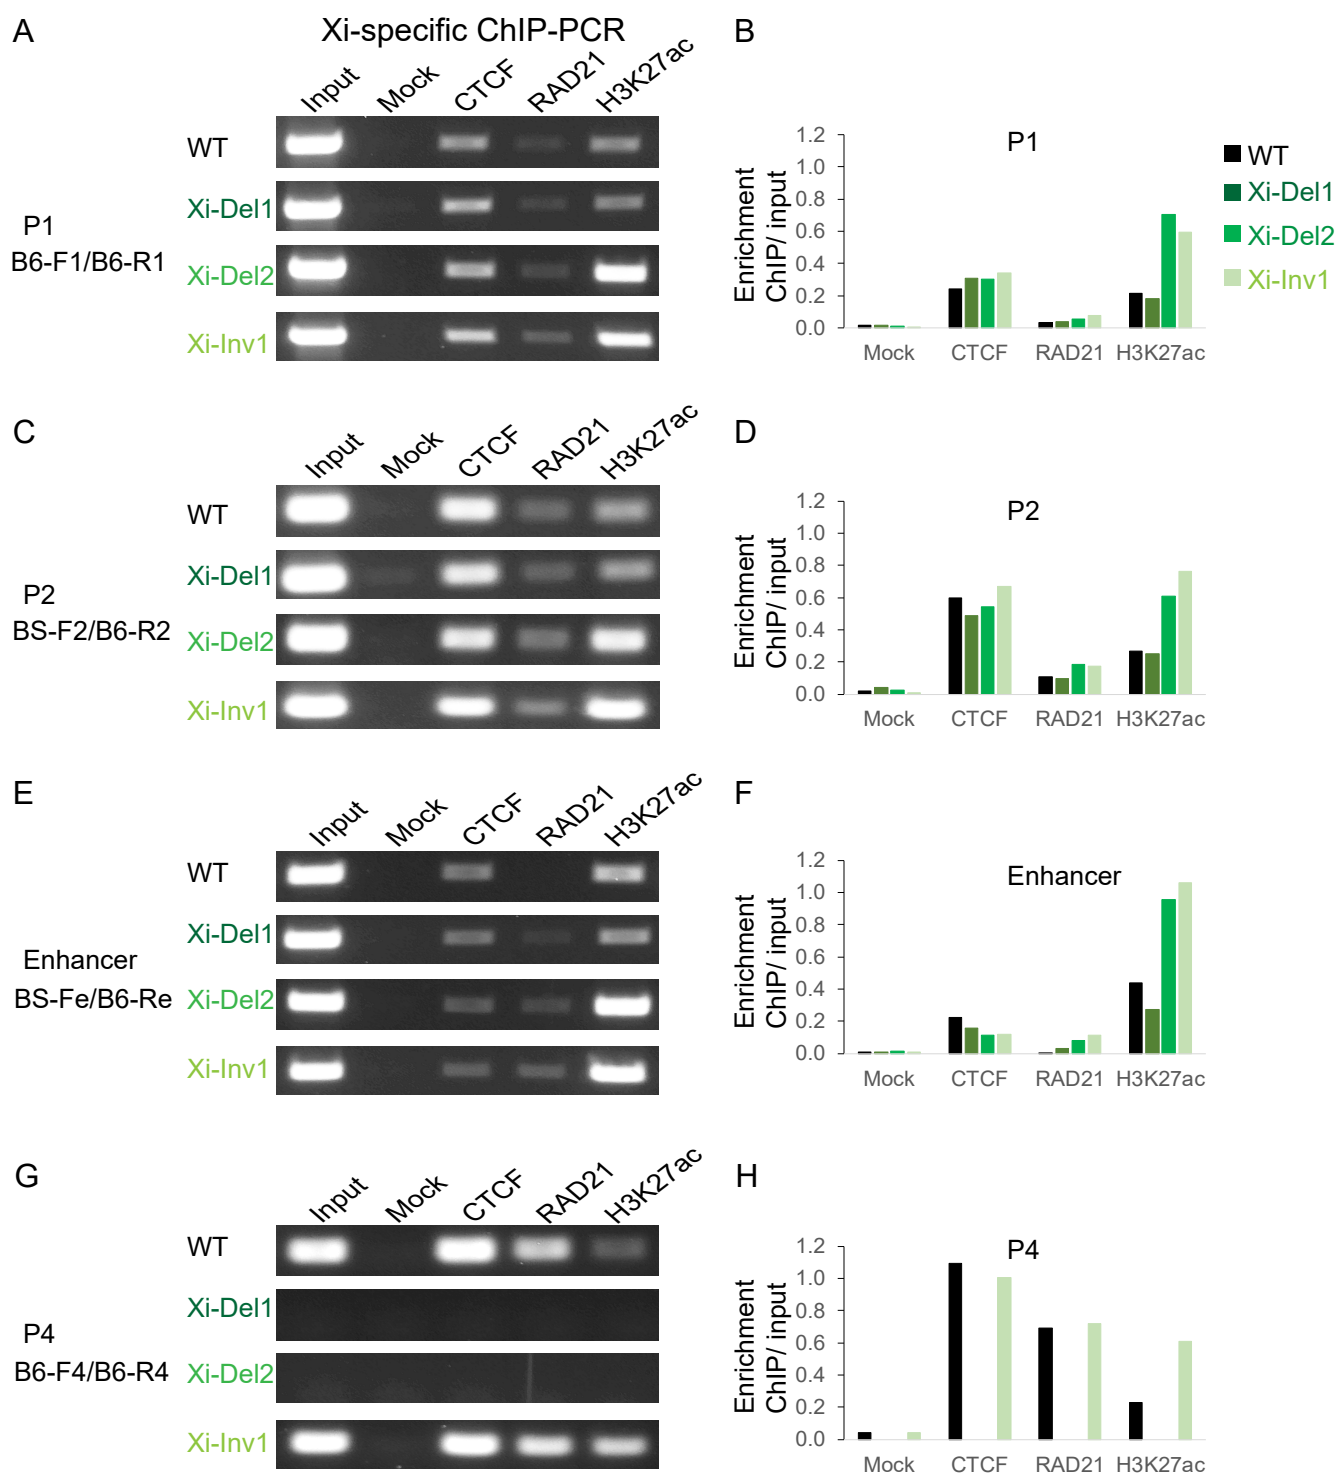

Fig. S12

Fig. S11

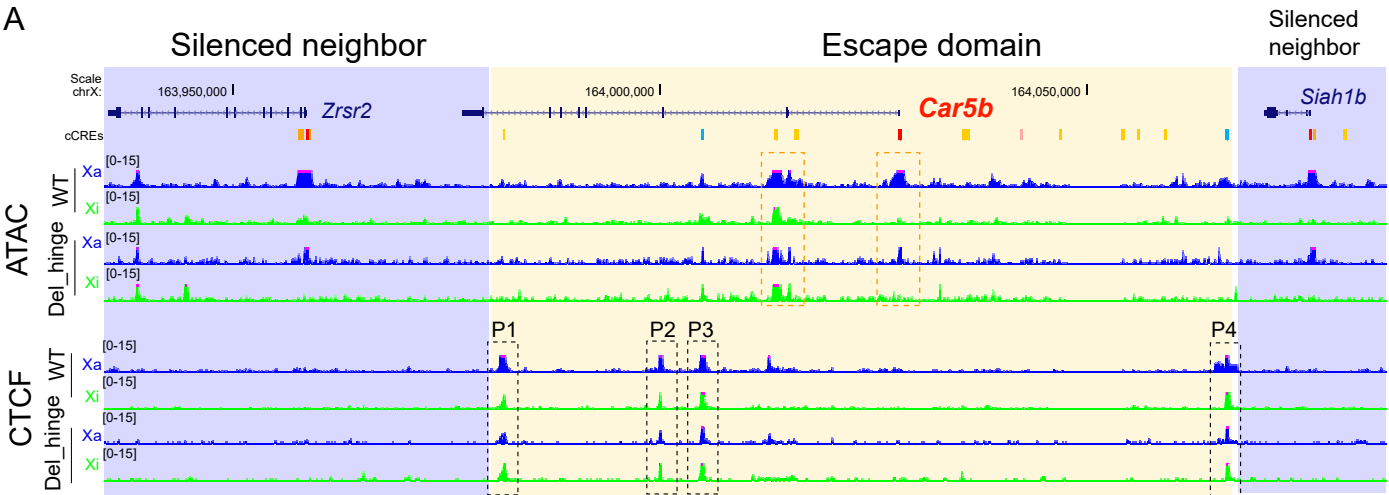

**B**

Effect of CTCF editing on *Car5b* escape in Del-hinge

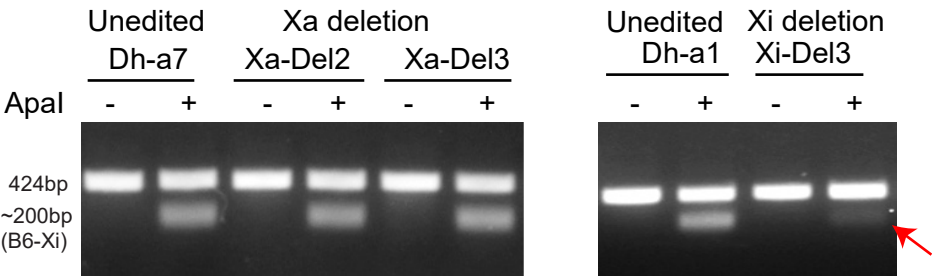

Fig. S12

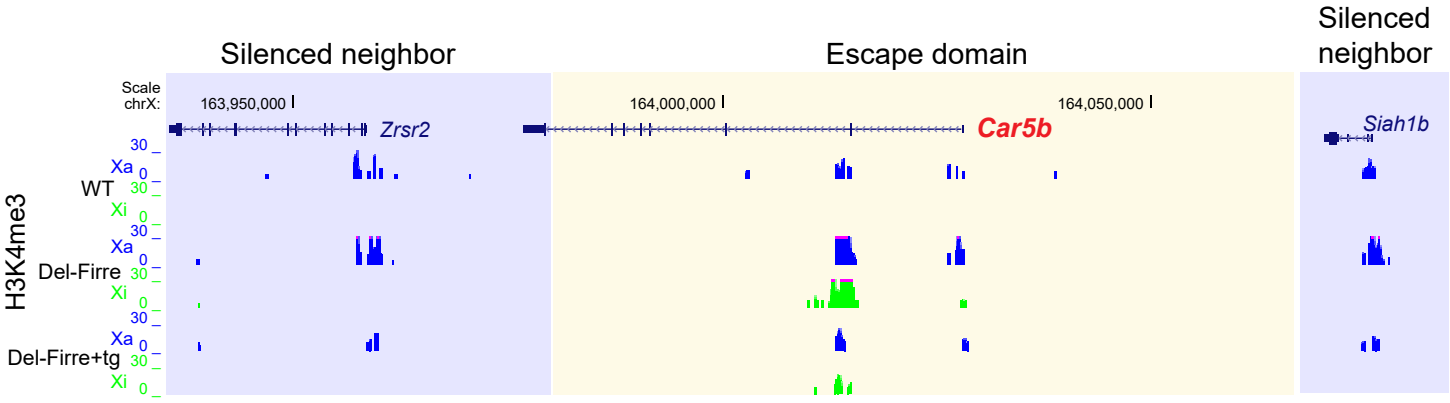



Fig. S13

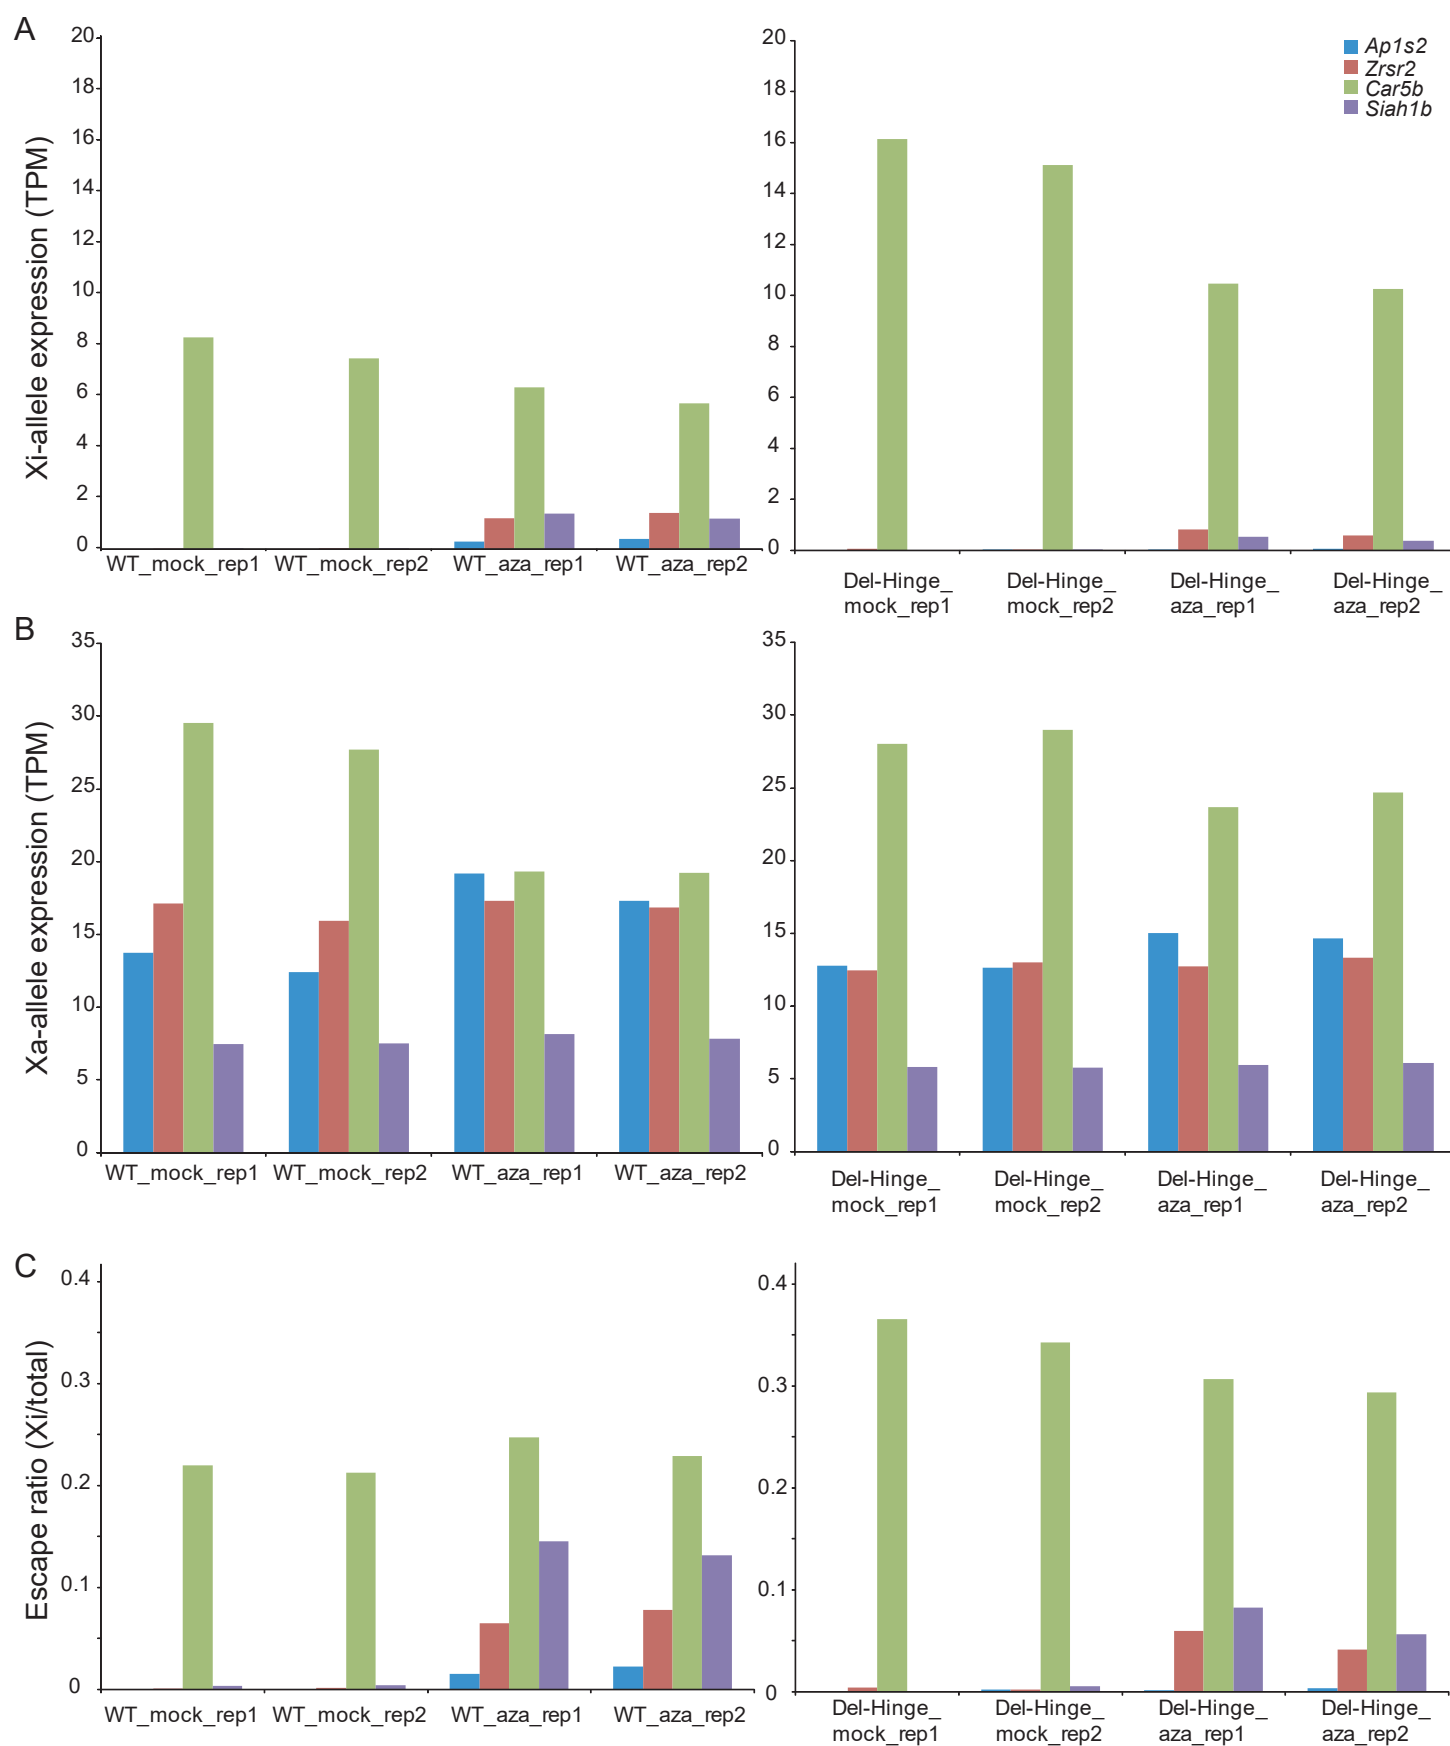

Supplement: MOESM1 [file 12915_2025_2137_MOESM1_ESM.pdf]
